# Supplementary material
Source: PubMed Central journal article supplement (PMC6509659)
Supplement: JB.00730-18-s0001.pdf [file JB.00730-18-s0001.pdf]

**Figure S1**

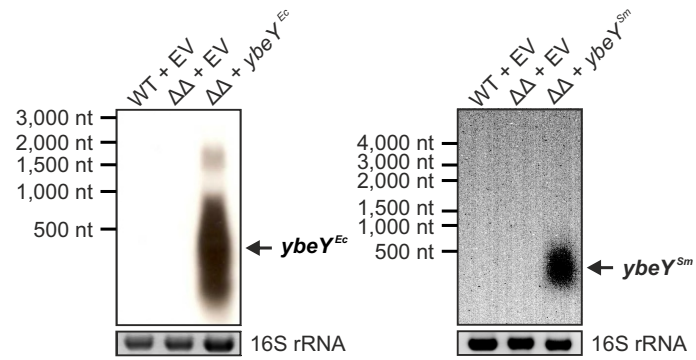

**Figure S1.** Northern blot of RNA isolated from a  $\Delta hfq \Delta ybeY$  strain, complemented with plasmid-encoded *ybeY<sup>Ec</sup>* (*E. coli*, left) or *ybeY<sup>Sm</sup>* (*S. meliloti*, right).

**Figure S2**

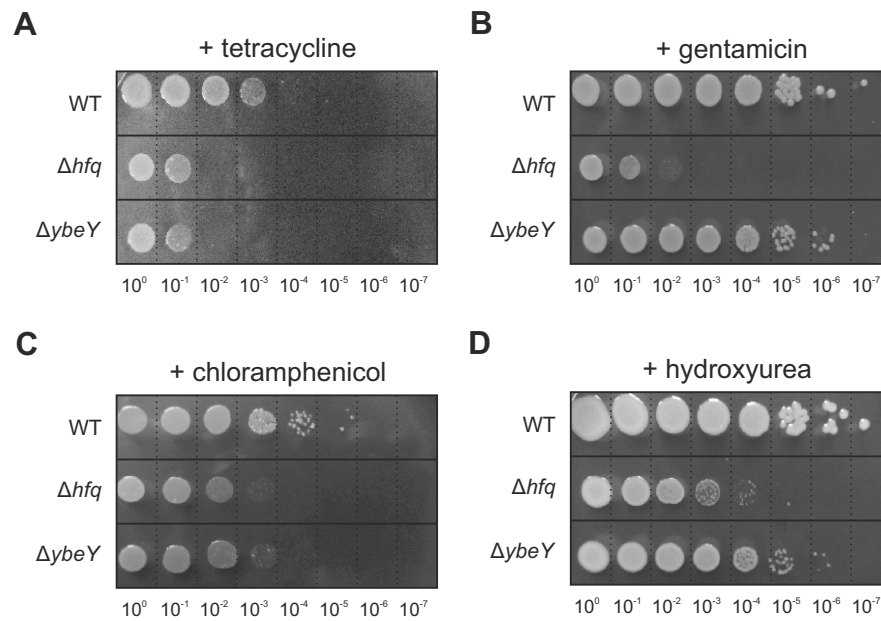

**Figure S2.** Application of 1  $\mu\text{g/ml}$  tetracycline (A), 4  $\mu\text{g/ml}$  gentamicin (B), 15  $\mu\text{g}/\mu\text{l}$  chloramphenicol (C) or 20 mM hydroxyurea (D) was used to assess stress tolerance of  $\Delta hfq$  and  $\Delta ybeY$  strains. The ribosome targeting antibiotics chloramphenicol and tetracycline had the strongest effect on the *ybeY* deletion strain but also inhibited growth of the *hfq* mutant. Gentamicin did not affect growth of the *ybeY* mutant, but drastically impaired growth of the *hfq* mutant. Addition of 20 mM hydroxyurea led to slightly reduced growth of  $\Delta hfq$  and  $\Delta ybeY$  strains.

**Figure S3**

**A**

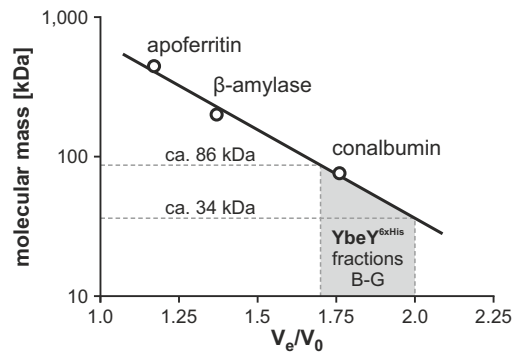

**B**

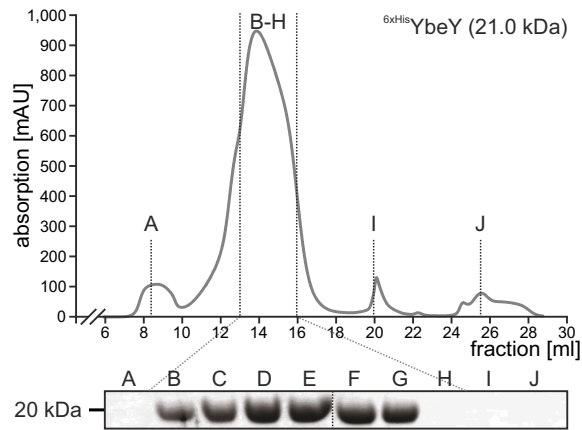

**Figure S3.** Gel filtration chromatography of standard proteins and <sup>6xHis</sup>YbeY. (A) Blue dextran (2,000 kDa) was used to determine the void volume ( $V_0$ ). Apoferritin (443 kDa),  $\beta$ -amylase (200 kDa) and conalbumin (76 kDa) were measured during GPC to calculate a standard curve based on the maximal absorption of the corresponding proteins and their relative molecular mass. (B) GPC of <sup>6xHis</sup>YbeY was done as in Fig. 8.

**Figure S4**

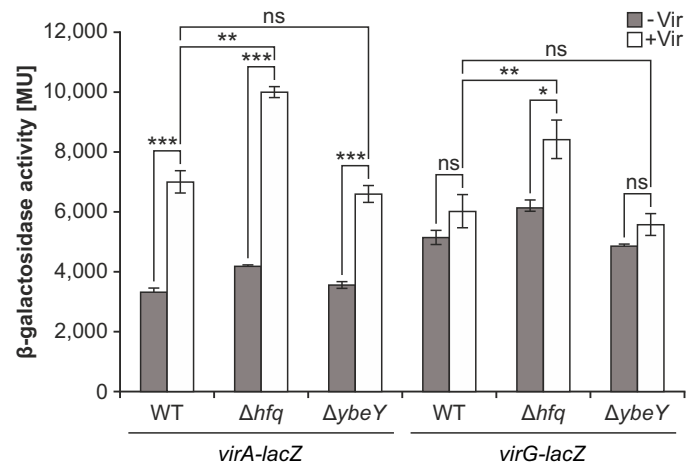

**Figure S4.** *virA-lacZ* and *virG-lacZ*  $\beta$ -galactosidase activity in *A. tumefaciens* WT,  $\Delta hfq$  and  $\Delta ybeY$  strains. \*\*\*  $p \leq 0.001$ ; \*\*  $p \leq 0.01$ ; \*  $p \leq 0.05$ ; ns, non-significant.

**Table S1.** Proteins differentially abundant in *A. tumefaciens*  $\Delta ybeY$  (iTRAQ)

up-regulated proteins (FC&gt;1.35)

| Accession | Annotation | Protein | Description                                                    | KEGG ontology (1) | $\Delta ybeY/WT$ ratio (2) | $\Delta ybeY/WT$ variability [%] | $\Delta hfq/WT$ ratio | replicates |
|-----------|------------|---------|----------------------------------------------------------------|-------------------|----------------------------|----------------------------------|-----------------------|------------|
| AAK88993  | Atu4447    | -       | ABC transporter, substrate binding protein (sorbitol)          | [1]               | 1.993                      | 8.5                              | 0.42                  | 3          |
| AAK89316  | Atu4115    | -       | ABC transporter, membrane spanning protein (dipeptide)         | [1]               | 1.910                      | 27.6                             | -                     | 2          |
| AAK89532  | Atu3887    | HspL    | small heat shock protein                                       | [5]               | 1.865                      | 1.6                              | -                     | 3          |
| AAK86885  | Atu1076    | CvpA    | colicin V production protein                                   | [7]               | 1.644                      | 22.3                             | -                     | 2          |
| AAK86357  | Atu0545    | FlaA    | flagella associated protein                                    | [4]               | 1.631                      | 24.3                             | -                     | 3          |
| AAK90221  | Atu3165    | -       | ABC transporter, substrate binding protein (sorbitol/mannitol) | [1]               | 1.529                      | 34.8                             | 0.36                  | 3          |
| AAK86844  | Atu1036    | -       | GTP-binding protein, Era family                                | [3]               | 1.510                      | 8.1                              | -                     | 3          |
| AAK86355  | Atu0542    | Fla     | flagellin                                                      | [4]               | 1.470                      | 8.7                              | 0.26                  | 3          |
| AAK91083  | Atu6120    | HupT    | HNS-type DNA binding protein                                   | [3]               | 1.465                      | 26.8                             | -                     | 2          |
| AAK88274  | Atu2549    | AmeR    | transcriptional regulator, TetR family                         | [7]               | 1.464                      | 17.6                             | -                     | 2          |
| AAK87079  | Atu1284    | BirA    | birA bifunctional protein                                      | [3]               | 1.463                      | 20.0                             | -                     | 3          |
| AAK87109  | Atu1318    | GatC    | glutamyl-tRNA-Gln-amidotransferase chain C                     | [6]               | 1.452                      | 35.4                             | -                     | 2          |
| AAK86042  | Atu0224    | CtpA    | components of type IV pilus, pilin subunit                     | [4]               | 1.439                      | 13.2                             | -                     | 2          |
| AAK86684  | Atu0877    | -       | conserved hypothetical protein                                 | [7]               | 1.436                      | 17.1                             | -                     | 2          |
| AAK88480  | Atu2765    | -       | transcriptional regulator, CarD family                         | [3]               | 1.417                      | 7.8                              | -                     | 3          |
| AAK90805  | Atu5430    | -       | hypothetical protein Atu5430                                   | [7]               | 1.404                      | 4.0                              | -                     | 2          |
| AAK89265  | Atu4170    | -       | conserved hypothetical protein                                 | [7]               | 1.404                      | 2.7                              | -                     | 3          |
| AAK88510  | Atu2797    | ChiG    | cobalamin biosynthesis protein                                 | [2]               | 1.392                      | 8.1                              | -                     | 2          |
| AAK88990  | Atu4450    | -       | ABC transporter, nucleotide binding/ATPase protein (sugar)     | [1]               | 1.384                      | 15.0                             | -                     | 3          |
| AAL41485  | Atu0466    | -       | hypothetical protein Atu0466                                   | [7]               | 1.382                      | 17.0                             | -                     | 3          |
| AAK89922  | Atu3472    | BkdA2   | 2-oxoisovalerate dehydrogenase beta subunit                    | [2]               | 1.375                      | 18.5                             | 0.31                  | 3          |
| AAK86438  | Atu0631    | MoaB    | molybdenum cofactor biosynthesis protein B                     | [7]               | 1.368                      | 4.0                              | -                     | 3          |
| AAK85925  | Atu0106    | CspA    | cold shock protein                                             | [3]               | 1.365                      | 16.8                             | -                     | 3          |
| AAK87328  | Atu1540    | -       | conserved hypothetical protein                                 | [7]               | 1.362                      | 8.3                              | -                     | 2          |
| AAK88459  | Atu2744    | -       | C4-dicarboxylate binding protein                               | [7]               | 1.354                      | 25.4                             | -                     | 3          |
| AAK85908  | Atu0088    | -       | conserved hypothetical protein                                 | [7]               | 1.352                      | 20.7                             | -                     | 3          |

## down-regulated proteins (FC&lt;0.75)

| Accession | Annotation | Protein | Description                                                                        | KEGG ontology (1) | $\Delta ybeY/WT$ ratio (2) | $\Delta ybeY/WT$ variability [%] | $\Delta hfq/WT$ ratio | replicates |
|-----------|------------|---------|------------------------------------------------------------------------------------|-------------------|----------------------------|----------------------------------|-----------------------|------------|
| AAK88379  | Atu2658    | GuaA    | GMP synthase - glutamine amidotransferase protein                                  | [5]               | 0.590                      | 27.5                             | -                     | 3          |
| AAK89058  | Atu4382    | NirK    | nitrite reductase, copper-containing                                               | [2]               | 0.591                      | 26.9                             | -                     | 3          |
| AAK90660  | Atu5284    | -       | alpha-amylase                                                                      | [6]               | 0.592                      | 5.0                              | -                     | 2          |
| AAK90320  | Atu3063    | -       | ABC transporter, nucleotide binding/ATPase protein                                 | [1]               | 0.593                      | 16.8                             | 11.92                 | 3          |
| AAK88073  | Atu2330    | -       | oxidoreductase                                                                     | [7]               | 0.610                      | 17.0                             | -                     | 2          |
| AAK90866  | Atu5491    | CatE    | catalase C                                                                         | [2]               | 0.638                      | 14.5                             | -                     | 3          |
| AAK90867  | Atu5492    | -       | conserved hypothetical protein                                                     | [7]               | 0.654                      | 16.3                             | -                     | 3          |
| AAK88868  | Atu4577    | -       | ABC transporter, substrate binding protein                                         | [1]               | 0.662                      | 7.0                              | 12.94                 | 3          |
| AAK89929  | Atu3465    | -       | metallo-beta-lactamase superfamily protein                                         | [7]               | 0.662                      | 0.9                              | -                     | 2          |
| AAK86796  | Atu0987    | -       | DNA polymerase                                                                     | [2]               | 0.662                      | 16.8                             | -                     | 2          |
| AAK88128  | Atu2391    | -       | ABC transporter, substrate binding protein (nitrate/sulfonate/taurine/bicarbonate) | [1]               | 0.667                      | 4.3                              | 9.82                  | 3          |
| AAK90472  | Atu5096    | -       | conserved hypothetical protein                                                     | [7]               | 0.678                      | 27.5                             | -                     | 2          |
| AAK90861  | Atu5484    | -       | conserved hypothetical protein                                                     | [7]               | 0.686                      | 8.0                              | -                     | 3          |
| AAK87480  | Atu1707    | -       | conserved hypothetical protein                                                     | [3]               | 0.696                      | 32.3                             | -                     | 3          |
| AAK90716  | Atu5343    | -       | ABC transporter, substrate binding protein (oligopeptide)                          | [1]               | 0.703                      | 5.6                              | 6.40                  | 3          |
| AAK89856  | Atu3542    | Prp1    | serine/threonine protein phosphatase I                                             | [2]               | 0.705                      | 22.2                             | -                     | 2          |
| AAK90661  | Atu5285    | GlgA    | glycogen synthase                                                                  | [2]               | 0.707                      | 35.7                             | -                     | 3          |
| AAK86750  | Atu0945    | -       | conserved hypothetical protein                                                     | [7]               | 0.710                      | 39.0                             | -                     | 2          |
| AAK86800  | Atu0991    | -       | cation efflux system component                                                     | [7]               | 0.711                      | 4.1                              | -                     | 2          |
| AAK88755  | Atu4695    | -       | ABC transporter, substrate binding protein (oligopeptide)                          | [1]               | 0.711                      | 4.1                              | 10.12                 | 3          |
| AAK90698  | Atu5324    | -       | zinc-binding oxidoreductase                                                        | [7]               | 0.713                      | 8.1                              | -                     | 2          |
| AAL44562  | Atu3752    | -       | conserved hypothetical protein                                                     | [7]               | 0.719                      | 10.8                             | -                     | 3          |
| AAK90868  | Atu5493    | -       | hypothetical protein Atu5493                                                       | [7]               | 0.720                      | 29.8                             | -                     | 3          |
| AAK87316  | Atu1525    | -       | conserved hypothetical protein                                                     | [7]               | 0.721                      | 17.6                             | -                     | 3          |
| AAK90608  | Atu5237    | -       | ABC transporter, substrate binding protein (amino acid)                            | [1]               | 0.723                      | 10.7                             | 5.10                  | 3          |
| AAK86137  | Atu0321    | MutM    | formamidopyrimidine-DNA glycosylase                                                | [3]               | 0.723                      | 21.5                             | -                     | 3          |

|          |         |       |                                                        |     |       |      |      |   |
|----------|---------|-------|--------------------------------------------------------|-----|-------|------|------|---|
| AAK88731 | Atu4719 | DppA3 | ABC transporter, substrate binding protein (dipeptide) | [1] | 0.732 | 12.8 | 7.73 | 3 |
| AAK87704 | Atu1942 | RpsS  | 30S ribosomal protein S19                              | [3] | 0.733 | 2.5  | -    | 3 |
| AAK90512 | Atu5139 | BlcC  | Zn-dependent gamma butyryl lactone lactonase           | [7] | 0.741 | 18.2 | -    | 2 |
| AAK88736 | Atu4714 | -     | conserved hypothetical protein                         | [7] | 0.742 | 0.5  | -    | 2 |
| AAK89127 | Atu4312 | SoxA  | sarcosine oxidase alpha subunit                        | [2] | 0.742 | 27.7 | 3.03 | 3 |
| AAK89668 | Atu3738 | -     | Na <sup>+</sup> /H <sup>+</sup> antiporter             | [1] | 0.745 | 16.4 | -    | 2 |
| AAK86736 | Atu0931 | -     | penicillin binding protein                             | [2] | 0.749 | 6.8  | -    | 2 |

[1] Transporters [2] Enzymes [3] Transcription [4] Motility & Chemotaxis [5] Translation [6] Others [7] Unknown

**Table S2.** Bacterial strains and plasmids used in this study

| Bacterial strains                                        | Relevant characteristics                                                                                                                      | Reference                  |
|----------------------------------------------------------|-----------------------------------------------------------------------------------------------------------------------------------------------|----------------------------|
| <b><i>Agrobacterium tumefaciens</i></b>                  |                                                                                                                                               |                            |
| C58                                                      | wild-type                                                                                                                                     | C. Baron, Montreal, Canada |
| C58 + v                                                  | Km <sup>R</sup> ; wild-type with pBBsyn empty vector control                                                                                  | (3)                        |
| C58 $\Delta hfq$                                         | deletion of <i>hfq</i> ( <i>atu1450</i> ) open reading frame (ORF)                                                                            | (3)                        |
| C58 <i>hfq</i> <sup>3xFLAG</sup>                         | chromosomal integration of 3xFLAG tag sequence at <i>hfq</i> 3' end                                                                           | (2)                        |
| C58 $\Delta ybeY$                                        | deletion of <i>ybeY</i> ( <i>atu0358</i> ) open reading frame (ORF)                                                                           | this study                 |
| C58 <i>ybeY</i> <sup>3xFLAG</sup>                        | chromosomal integration of 3xFLAG tag sequence at <i>hfq</i> 3' end                                                                           | this study                 |
| C58 $\Delta hfq \Delta ybeY$                             | $\Delta hfq \Delta ybeY$ double deletion strain                                                                                               | this study                 |
| C58 $\Delta hfq \Delta ybeY$ + v                         | Km <sup>R</sup> ; $\Delta hfq \Delta ybeY$ , with pBBsyn empty vector control                                                                 | this study                 |
| C58 $\Delta hfq \Delta ybeY$ + <i>hfq</i>                | Km <sup>R</sup> ; $\Delta hfq \Delta ybeY$ , with pBBsyn_ <i>hfq</i> complementation plasmid                                                  | this study                 |
| C58 $\Delta hfq \Delta ybeY$ + <i>ybeY</i>               | Km <sup>R</sup> ; $\Delta hfq \Delta ybeY$ , with pBBsyn_ <i>ybeY</i> complementation plasmid                                                 | this study                 |
| C58 $\Delta hfq \Delta ybeY$ + <i>ybeY</i> <sup>Ec</sup> | Km <sup>R</sup> ; $\Delta hfq \Delta ybeY$ , with pBBsyn_ <i>ybeY</i> <sup>Ec</sup> complementation plasmid                                   | this study                 |
| C58 $\Delta hfq \Delta ybeY$ + <i>ybeY</i> <sup>Sm</sup> | Km <sup>R</sup> ; $\Delta hfq \Delta ybeY$ , with pBBsyn_ <i>ybeY</i> <sup>Sm</sup> complementation plasmid                                   | this study                 |
| C58 $\Delta hfq$ + pBISN1                                | Km <sup>R</sup> ; <i>hfq</i> mutant with pBISN1                                                                                               | (3)                        |
| C58 $\Delta ybeY$ + pBISN1                               | Km <sup>R</sup> ; <i>ybeY</i> mutant with pBISN1                                                                                              | this study                 |
| <b><i>Escherichia coli</i></b>                           |                                                                                                                                               |                            |
| BL21 DE3                                                 | strain for pET-based protein expression                                                                                                       | Novagen, Madison, USA      |
| BL21 DE3, <i>ybeY</i> _C-His                             | Km <sup>R</sup> ; BL21 DE3 with pET24b_ <i>ybeY</i> _C-His                                                                                    | this study                 |
| BL21 DE3, <i>ybeY</i> _N-His                             | Km <sup>R</sup> ; BL21 DE3 with pET28b_ <i>ybeY</i> _N-His                                                                                    | this study                 |
| BL21 DE3, <i>hfq</i> _C-His                              | Km <sup>R</sup> ; BL21 DE3 with pET24b_ <i>hfq</i> _C-His                                                                                     | (3)                        |
| <b>Plasmids</b>                                          |                                                                                                                                               |                            |
| pK19 <i>mobsacB</i>                                      | Km <sup>R</sup> , suicide vector for mutagenesis                                                                                              | (4)                        |
| <i>ybeY</i> _up_3xFLAG_down                              | Km <sup>R</sup> , upstream region including <i>ybeY</i> ORF with additional 3' end 3xFLAG fusion and downstream region in pK19 <i>mobsacB</i> | this study                 |
| <i>ybeY</i> _up_dwn                                      | Km <sup>R</sup> , up- and downstream region of <i>ybeY</i> for mutagenesis                                                                    | this study                 |
| pBBsyn                                                   | Km <sup>R</sup> ; complementation vector                                                                                                      | Novagen, Madison, USA      |



|                                   |                                                                                                                                   |            |
|-----------------------------------|-----------------------------------------------------------------------------------------------------------------------------------|------------|
| pBBSyn_ <i>hfq</i>                | Km <sup>R</sup> ; pBBSyn derivate carrying the <i>hfq</i> gene for complementation                                                | (3)        |
| pBBSyn_ <i>ybeY</i>               | Km <sup>R</sup> ; pBBSyn derivate carrying the <i>ybeY</i> ( <i>atu0358</i> ) gene for complementation                            | this study |
| pBBSyn_ <i>ybeY</i> <sup>Ec</sup> | Km <sup>R</sup> ; pBBSyn derivate carrying the <i>E. coli</i> K12 <i>ybeY</i> gene for complementation                            | this study |
| pBBSyn_ <i>ybeY</i> <sup>Sm</sup> | Km <sup>R</sup> ; pBBSyn derivate carrying the <i>S. meliloti ybeY</i> <sup>Sm</sup> ( <i>smc01113</i> ) gene for complementation | this study |
| pBISN1                            | Km <sup>R</sup> ; pBin19 derivate carrying T-DNA borders enclosing the <i>gusA</i> intron                                         | (5)        |
| pET24b_ <i>ybeY</i> _C-His        | Km <sup>R</sup> ; pET24b derivate carrying the <i>ybeY</i> gene with a 6xHis tag a the 3' end                                     | this study |
| pET28b_ <i>ybeY</i> _N-His        | Km <sup>R</sup> ; pET28b derivate carrying the <i>ybeY</i> gene with a 6xHis tag a the 5' end                                     | this study |
| pAC01_ <i>virB-lacZ</i>           | Km <sup>R</sup> ; <i>virB1-lacZ</i> fusion (transcriptional) in pAC01                                                             | (6)        |
| pET24b_ <i>hfq</i> _C-His         | Km <sup>R</sup> ; pET24b derivate carrying the <i>hfq</i> gene with a 6xHis tag a the 3' end                                      | (3)        |

**Table S3.** Oligonucleotides used in this study

| Oligonucleotide                                                                      | Sequence 5' to 3'                                  |
|--------------------------------------------------------------------------------------|----------------------------------------------------|
| <b>ybeY mutagenesis</b>                                                              |                                                    |
| <i>ybeY</i> _up_PstI_fw                                                              | AAA <u>ACTGCAG</u> CCAACGCCCGTCATTCTGG             |
| <i>ybeY</i> _up_SmaI_rv                                                              | AAA <u>CCCGGG</u> TGTCTTTACGTCAGTTGCCCTTCGG        |
| <i>ybeY</i> _down_SmaI_fw                                                            | AAA <u>CCCGGG</u> AATTGTCTGGAGCCATGAACG            |
| <i>ybeY</i> _down_EcoRI_rv                                                           | AAA <u>GAA</u> TTCGACCCGAACCTCCCGAAACG             |
| <b>ybeY 3xFLAG integration</b>                                                       |                                                    |
| <i>ybeY</i> _up_SalI_rv                                                              | AAA <u>AGTCGAC</u> AAGCGGCTCCTGACCCGCG             |
| <i>ybeY</i> _down_Acc65I_fw                                                          | AAA <u>AGGTACC</u> ATATTGTCTGGAGCCATGAACG          |
| 3xFLAG_SalI_fw                                                                       | AAA <u>AGTCGAC</u> GACTACAAAGACCATGACGGTG          |
| 3xFLAG_Acc65I_rv                                                                     | AAA <u>AGGTACC</u> TCTATTTATCGTCGTCATCTTTGTAG      |
| <b>YbeY His-tag fusion proteins</b>                                                  |                                                    |
| <i>ybeY</i> _C_fw_EcoRI                                                              | <u>GAATTC</u> ATGGCGGCTCTGGATATTCAAATCAGC          |
| <i>ybeY</i> _C_rv_SalI                                                               | <u>GTCGACA</u> AGCGGCTCCTGACCCGCGT                 |
| <i>ybeY</i> _N_fw_NdeI                                                               | <u>CATATG</u> ATGGCGGCTCTGGATATTCAAATCAGC          |
| <i>ybeY</i> _N_rv_XhoI                                                               | <u>CTCGAGT</u> TAAAGCGGCTCCTGACCCGCG               |
| <b>Complementation with ybeY homologs from <i>S. meliloti</i> and <i>E. coli</i></b> |                                                    |
| <i>smc01113</i> _fw_XbaI                                                             | <u>TCTAGA</u> AATGACGGCATTGGACATTCAAGATCAGC        |
| <i>smc01113</i> _rv_SacI                                                             | <u>GAGCTC</u> TTAATGCGGGGGTTGGTCCCCG               |
| <i>Ec_ybeY</i> _fw_XbaI                                                              | <u>TCTAGA</u> AATGAGTCAGGTGATCCTCGATTTACAACCTG     |
| <i>Ec_ybeY</i> _rv_SacI                                                              | <u>GAGCTC</u> TATTCTTTCTCGGCAATGTACGGATCC          |
| <b>5' RACE</b>                                                                       |                                                    |
| adapter oligo                                                                        | GTCAGCAATCCCTAACGAG ( <i>GAG ribonucleotides</i> ) |
| 5'RACE_rv_1                                                                          | GGTAGGCCTTTACCCACC                                 |
| 5'RACE_rv_2                                                                          | GGGCGTATGCGGTATTAATTCC                             |

Restriction sites are underlined. T7 promoter sequences are written in bold letters.

## References

1. Ogata H, Goto S, Sato K, Fujibuchi W, Bono H, Kanehisa M. 1999. KEGG: Kyoto Encyclopedia of Genes and Genomes. *Nucleic Acids Res.* 1999 Jan 1;27(1):29-34.
2. Möller P, Overlöper A, Förstner KU, Wen T-N, Sharma CM, Lai E-M, Narberhaus F. 2014. Profound impact of Hfq on nutrient acquisition, metabolism and motility in the plant pathogen *Agrobacterium tumefaciens*. *PLOS ONE* 9:e110427.
3. Wilms I, Möller P, Stock AM, Gurski R, Lai EM, Narberhaus F. 2012. Hfq influences multiple transport systems and virulence in the plant pathogen *Agrobacterium tumefaciens*. *J Bacteriol* 194:5209-17.
4. Schäfer A, Tauch A, Jäger W, Kalinowski J, Thierbach G, Pühler A. 1994. Small mobilizable multi-purpose cloning vectors derived from the *Escherichia coli* plasmids pK18 and pK19: selection of defined deletions in the chromosome of *Corynebacterium glutamicum*. *Gene*. 1994 Jul 22;145(1):69-73.
5. Narasimhulu SB, Deng XB, Sarria R, Gelvin SB. 1996. Early transcription of *Agrobacterium* T-DNA genes in tobacco and maize. *Plant Cell* 8:873-86.
6. Klüsener S, Hacker S, Tsai YL, Bandow JE, Gust R, Lai EM, Narberhaus F. 2010. Proteomic and transcriptomic characterization of a virulence-deficient phosphatidylcholine-negative *Agrobacterium tumefaciens* mutant. *Mol Genet Genomics*. 2010 Jun;283(6):575-89.
